# Supplementary material
Source: HighWire-hosted journal article supplement (https://jnis.bmj.com/content/neurintsurg-2020-016250)
Supplement: inline-supplementary-material-1 [file inline-supplementary-material-1.pdf]

# Supplementary Figure 1

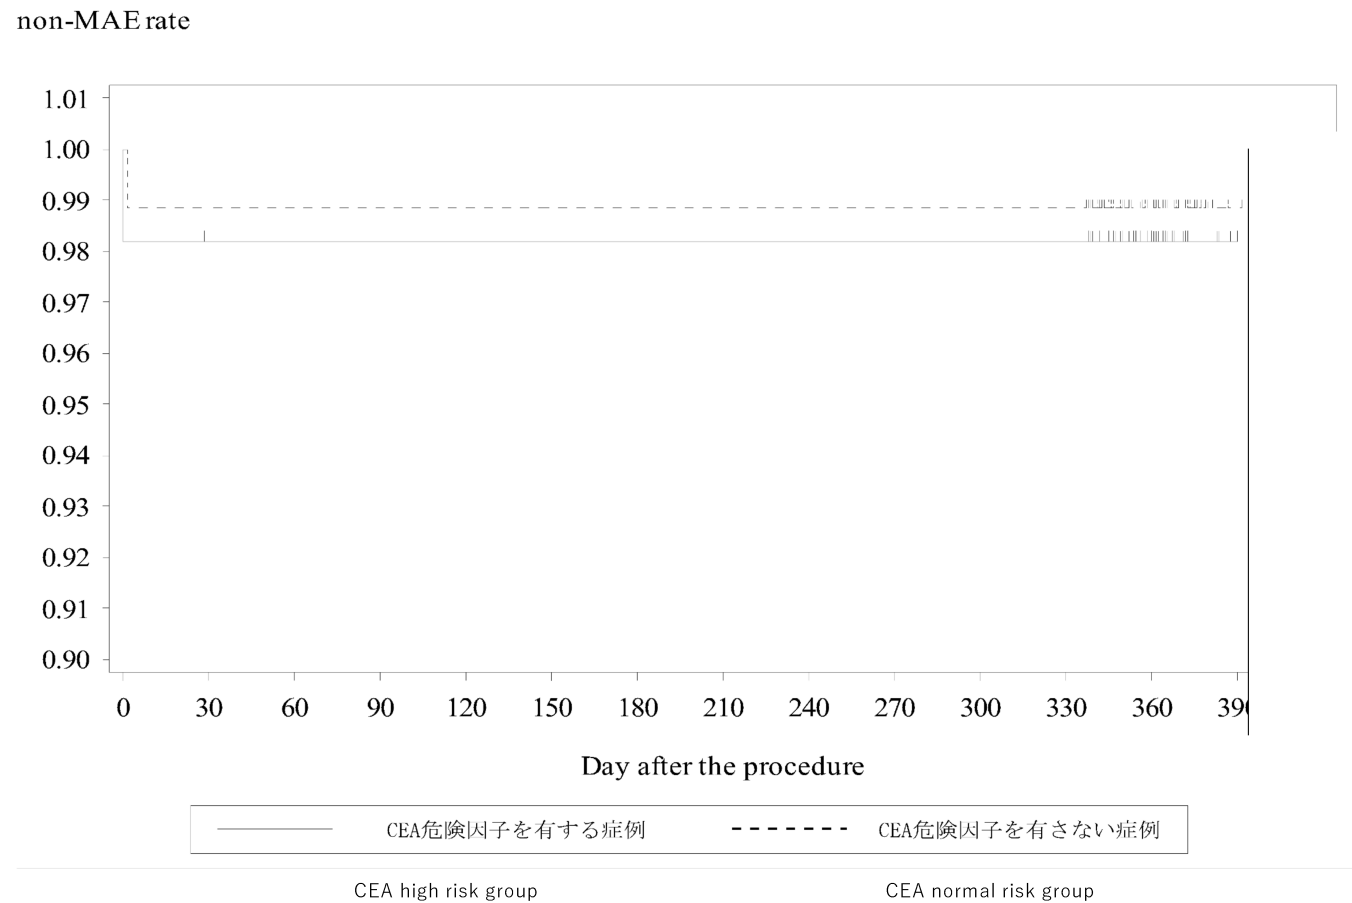

Supplementary Fig. 1. **Non-MAE rates in the CEA high-risk and normal-risk groups** Only one MAE occurred in each group, and the non-MAE rates in the CEA high- and normal-risk groups were 98.2% and 98.8%, respectively. There was no significant difference between the two groups.
